# Supplementary material for: Deficiency of mitochondrial aldehyde dehydrogenase increases type 2 diabetes risk in males via autophagy dysregulation
Source: PubMed Central journal article supplement — Chin Med J (Engl). 2021 Apr 1;134(18):2246–8. doi: 10.1097/CM9.0000000000001408 (PMC8478383; doi:10.1097/cm9.0000000000001408), 2021-04-01
Supplement: cm9-134-2246-s001.pdf [file cm9-134-2246-s001.pdf]

**Supplementary Table 1:** Baseline data of 850 consecutive patients.

| Items                      | Non-diabetes<br>( <i>n</i> = 780) | Diabetes<br>( <i>n</i> = 70) | <i>P</i> -value |
|----------------------------|-----------------------------------|------------------------------|-----------------|
| Gender, <i>n</i> (%)       |                                   |                              |                 |
| Male                       | 523 (67.05)                       | 55 (78.51)                   | *               |
| Female                     | 257 (32.95)                       | 15 (21.43)                   |                 |
| Age (years)                | 47.66 ± 0.39                      | 52.38 ± 1.18                 | *               |
| Height (cm)                | 167.16 ± 0.29                     | 167.67 ± 0.92                | N.S.            |
| Weight (kg)                | 69.35 ± 0.45                      | 76.37 ± 1.58                 | *               |
| BMI (kg/m <sup>2</sup> )   | 24.69 ± 0.12                      | 27.08 ± 0.46                 | *               |
| Hypertension, <i>n</i> (%) | 174 (22.31)                       | 37% (52.86)                  | *               |
| Heart rate (beats/min)     | 69.37 ± 0.29                      | 72.03 ± 1.10                 | *               |

\* *P* < 0.05. NS: Not significant.
